# Supplementary material for: Assessing Ghana’s eHealth workforce: implications for planning and training
Source: Hum Resour Health. 2018 Nov 27;16:65. doi: 10.1186/s12960-018-0330-8 (PMC6260724; doi:10.1186/s12960-018-0330-8)
Supplement: Supplementary file 4 — A workbook for estimating workload and sufficiency of the IT cadre using WISN. (XLSX 23 kb) [file 12960_2018_330_MOESM4_ESM.xlsx]

## Sheet: ServiceActivities
Average available working hours in a day	8
Average working days in a week	5
Average working hours in a week	40
Average working days in a year	205
Average working hours in a year	1640
Number of staff
Number of PC and accessories
Workload component	Unit time (Minutes)	Unit time (Hours)	Standard workload (cases)
Techinical support for staff and end-users	45	0.75	2186.67
Software installation	30	0.5	3280
Hardware installation	25	0.416667	3936
Troubleshooting	60	1	1640

## Sheet: SupportActivities
Average available working hours in a day	8
Average working days in a week	5
Average working hours in a week	40
Average working days in a year	205
Average working hours in a year	1640
Workload components	CAS (actual working time)	Unit	CAS % (percentage working time)
System checks	2	Hours /Day	25
System upgrades	2	Hours /Day	25
Training and workshop	8	Hours /Month	5.85366
Meetings	3	Hours /Month	2.19512
Total CAS %			58.0488

## Sheet: AdditionalActivities
Average available working hours in a day	8
Average working days in a week	5
Average working hours in a week	40
Average working days in a year	205
Average working hours in a year	1640
Workload components	No of Staff	IAS (actual working time/case per person)	Unit	Annual IAS (for all staff performaing activity)
Network administration	1	24	Hours /Day	4920
Database administration	1	8	Hours /Day	1640
Server administration	1	24	Hours /Day	4920
Administrative duties	1	1	Hours /Day	205
Staff training and supervision	2	2	Hours /Day	1640
Presendations and report writing	1	8	Hours /Week	416

## Sheet: LA
Staff category:	IT at LA General Hospital
Average working days in a year	205
AWT:	1640
Total no. of hospital staff	445
Average number of Computer hardware	333.75
Total no. of IT staff	1
Average working days in a year	205
Average working hours in a year	1640
Health service activity of all HIM cadre	Workload component	Annual workload	Standard workload	Required number of staff
	Techinical support for staff and end-users	445	2186.67	0.203506
	Software installation	1001.25	3280	0.305259
	Hardware installation	333.75	3936	0.0847942
	Troubleshooting	333.75	1640	0.203506
A. Total required staff for health service activities				0.797066
Support activities of all cadres	Workload component	CAS (actual working time)		CAS (% working time)
	System checks	2 hours per day		25
	System upgrades	2 hours per day		25
	Training and workshop	8 hours per month		5.85366
	Meetings	3 hours per month		2.19512
Total CAS percentage				58.0488
B. Category allowance factor: {1 / [1 - (total CAS percentage / 100)]}				2.38372
Additional activities of certain cadre members	Workload components	No. of staff performing the work	IAS (actual working time/case per person)	Annual IAS (for all staff performaing activity)
	Network administration	1	24	4920
	Database administration	1	8	1640
	Server administration	1	24	4920
	Administrative duties	1	1	205
	Staff training and supervision	0.1	2	41
	Presendations and report writing	1	8	1640
Total IAS in a year				13366
C. Individual allowance factor (Annual total IAS /AWT)				8.15
Total required number of staff based on WISN: (A * B + C)				10.05

## Sheet: Ridge
Staff category:	IT at Ridge Hospital
Average working days in a year	205
AWT:	1640
Total no. of hospital staff	785
Average number of Computer hardware	588.75
Total no. of IT staff	7
Average working days in a year	205
Average working hours in a year	1640
Health service activity of all HIM cadre	Workload component	Annual workload	Standard workload	Required number of staff
	Techinical support for staff and end-users	785	2186.67	0.358994
	Software installation	1766.25	3280	0.538491
	Hardware installation	588.75	3936	0.149581
	Troubleshooting	588.75	1640	0.358994
A. Total required staff for health service activities				1.40606
Support activities of all cadres	Workload component	CAS (actual working time)		CAS (% working time)
	System checks	2 hours per day		25
	System upgrades	2 hours per day		25
	Training and workshop	8 hours per month		5.85366
	Meetings	3 hours per month		2.19512
Total CAS percentage				58.0488
B. Category allowance factor: {1 / [1 - (total CAS percentage / 100)]}				2.38372
Additional activities of certain cadre members	Workload components	No. of staff performing the work	IAS (actual working time/case per person)	Annual IAS (for all staff performaing activity)
	Network administration	1	24	4920
	Database administration	1	8	1640
	Server administration	1	24	4920
	Administrative duties	1	1	205
	Staff training and supervision	0.7	2	287
	Presendations and report writing	1	8	1640
Total IAS in a year				13612
C. Individual allowance factor (Annual total IAS /AWT)				8.3
Total required number of staff based on WISN: (A * B + C)				11.6517

## Sheet: UG
Staff category:	IT at UG Hospital
Average working days in a year	205
AWT:	1640
Total no. of hospital staff	370
Average number of Computer hardware	277.5
Total no. of IT staff	1
Average working days in a year	205
Average working hours in a year	1640
Health service activity of all HIM cadre	Workload component	Annual workload	Standard workload	Required number of staff
	Techinical support for staff and end-users	370	2186.67	0.169207
	Software installation	832.5	3280	0.253811
	Hardware installation	277.5	3936	0.070503
	Troubleshooting	277.5	1640	0.169207
A. Total required staff for health service activities				0.662729
Support activities of all cadres	Workload component	CAS (actual working time)		CAS (% working time)
	System checks	2 hours per day		25
	System upgrades	2 hours per day		25
	Training and workshop	8 hours per month		5.85366
	Meetings	3 hours per month		2.19512
Total CAS percentage				58.0488
B. Category allowance factor: {1 / [1 - (total CAS percentage / 100)]}				2.38372
Additional activities of certain cadre members	Workload components	No. of staff performing the work	IAS (actual working time/case per person)	Annual IAS (for all staff performaing activity)
	Network administration	1	24	4920
	Database administration	1	8	1640
	Server administration	1	24	4920
	Administrative duties	1	1	205
	Staff training and supervision	0.1	2	41
	Presendations and report writing	1	8	1640
Total IAS in a year				13366
C. Individual allowance factor (Annual total IAS /AWT)				8.15
Total required number of staff based on WISN: (A * B + C)				9.72976

## Sheet: Sufficiency_IT
Health facility	Staff mix	Current number	Required no., based on WISN	Shortage or excess	Workforce problem	WISN ratio	Workload pressure
LA	F	1	10	-9	Shortage	0.1	High
	F + P	7	11	-4	Shortage	0.636364	High
Ridge	F	7	12	-5	Shortage	0.583333	High
	F + P	19	13	6	Surplus	1.46154	None
UG	F	1	10	-9	Shortage	0.1	High
	F + P	1	10	-9	Shortage	0.1	High
